# Supplementary material
Source: MDPI journal article supplement (https://www.mdpi.com/2073-8994/15/9/1772)
Supplement: s1 [file s1 › symmetry-2503935-supplementary.pdf]

# Supplementary Material of “Statistical Modeling of Financial Data with Skew-Symmetric Error Distributions”

September 14, 2023

## 1 Nikkei Industry Classification Codes

| Major                  | Middle                             | Minor                            | Major | Middle | Minor |
|------------------------|------------------------------------|----------------------------------|-------|--------|-------|
| Manufacturing Industry | Foods                              | Feeds                            | 1     | 01     | 001   |
| Manufacturing Industry | Foods                              | Sugar Refining                   | 1     | 01     | 002   |
| Manufacturing Industry | Foods                              | Grain Mill Products              | 1     | 01     | 003   |
| Manufacturing Industry | Foods                              | Vegetable Oils                   | 1     | 01     | 004   |
| Manufacturing Industry | Foods                              | Breweries & Distilleries         | 1     | 01     | 005   |
| Manufacturing Industry | Foods                              | Bakery Products                  | 1     | 01     | 006   |
| Manufacturing Industry | Foods                              | Meat Products                    | 1     | 01     | 007   |
| Manufacturing Industry | Foods                              | Flavoring Extracts               | 1     | 01     | 008   |
| Manufacturing Industry | Foods                              | Dairy Products                   | 1     | 01     | 009   |
| Manufacturing Industry | Foods                              | Foods, NEC                       | 1     | 01     | 010   |
| Manufacturing Industry | Textile Products                   | Chemistry & Synthetic Fibers     | 1     | 03     | 021   |
| Manufacturing Industry | Textile Products                   | Cotton Spinning & Weaving        | 1     | 03     | 022   |
| Manufacturing Industry | Textile Products                   | Silk Reeling                     | 1     | 03     | 023   |
| Manufacturing Industry | Textile Products                   | Wool Spinning & Weaving          | 1     | 03     | 024   |
| Manufacturing Industry | Textile Products                   | Finished Textile Goods           | 1     | 03     | 025   |
| Manufacturing Industry | Textile Products                   | Miscellaneous Textile Products   | 1     | 03     | 026   |
| Manufacturing Industry | Pulp & Paper                       | Pulp and Paper (Major)           | 1     | 05     | 041   |
| Manufacturing Industry | Pulp & Paper                       | Other Paper                      | 1     | 05     | 042   |
| Manufacturing Industry | Chemicals                          | Chemicals (Major)                | 1     | 07     | 061   |
| Manufacturing Industry | Chemicals                          | Chemical Fertilizers             | 1     | 07     | 062   |
| Manufacturing Industry | Chemicals                          | Alkali & Chlorine                | 1     | 07     | 063   |
| Manufacturing Industry | Chemicals                          | Petro-Chemicals                  | 1     | 07     | 064   |
| Manufacturing Industry | Chemicals                          | Plastics                         | 1     | 07     | 065   |
| Manufacturing Industry | Chemicals                          | Oxygen                           | 1     | 07     | 066   |
| Manufacturing Industry | Chemicals                          | Oils, Fats & Soap                | 1     | 07     | 067   |
| Manufacturing Industry | Chemicals                          | Cosmetics & Toilet Goods         | 1     | 07     | 068   |
| Manufacturing Industry | Chemicals                          | Paint & Printing Inks            | 1     | 07     | 069   |
| Manufacturing Industry | Chemicals                          | Agricultural Chemicals           | 1     | 07     | 070   |
| Manufacturing Industry | Chemicals                          | Chemical Products, NEC           | 1     | 07     | 071   |
| Manufacturing Industry | Drugs                              | Drugs (Major)                    | 1     | 09     | 081   |
| Manufacturing Industry | Drugs                              | Ethical Drugs                    | 1     | 09     | 082   |
| Manufacturing Industry | Drugs                              | Proprietary Drugs                | 1     | 09     | 083   |
| Manufacturing Industry | Petroleum                          | Oil Refining & Sales             | 1     | 11     | 101   |
| Manufacturing Industry | Petroleum                          | Oil & Coal Products              | 1     | 11     | 102   |
| Manufacturing Industry | Rubber Products                    | Tires                            | 1     | 13     | 121   |
| Manufacturing Industry | Rubber Products                    | Rubber Products, NEC             | 1     | 13     | 122   |
| Manufacturing Industry | Stone, Clay & Glass Products       | Glass                            | 1     | 15     | 141   |
| Manufacturing Industry | Stone, Clay & Glass Products       | Cement                           | 1     | 15     | 142   |
| Manufacturing Industry | Stone, Clay & Glass Products       | Concrete Products                | 1     | 15     | 143   |
| Manufacturing Industry | Stone, Clay & Glass Products       | Pottery & Related Products       | 1     | 15     | 144   |
| Manufacturing Industry | Stone, Clay & Glass Products       | Bricks                           | 1     | 15     | 145   |
| Manufacturing Industry | Stone, Clay & Glass Products       | Carbon, NEC                      | 1     | 15     | 146   |
| Manufacturing Industry | Iron & Steel                       | Iron & Steel (Major)             | 1     | 17     | 161   |
| Manufacturing Industry | Iron & Steel                       | Ordinary Steel                   | 1     | 17     | 162   |
| Manufacturing Industry | Iron & Steel                       | Special Steel                    | 1     | 17     | 163   |
| Manufacturing Industry | Iron & Steel                       | Alloy Steel                      | 1     | 17     | 164   |
| Manufacturing Industry | Iron & Steel                       | Iron & Steel Foundries           | 1     | 17     | 165   |
| Manufacturing Industry | Iron & Steel                       | Stainless Steel                  | 1     | 17     | 166   |
| Manufacturing Industry | Iron & Steel                       | Steel, NEC                       | 1     | 17     | 167   |
| Manufacturing Industry | Non ferrous Metal & Metal Products | Non-Ferrous Refining (Major)     | 1     | 19     | 181   |
| Manufacturing Industry | Non ferrous Metal & Metal Products | Other Non-Ferrous Metal Refining | 1     | 19     | 182   |
| Manufacturing Industry | Non ferrous Metal & Metal Products | Aluminum                         | 1     | 19     | 183   |
| Manufacturing Industry | Non ferrous Metal & Metal Products | Wire & Cable                     | 1     | 19     | 184   |
| Manufacturing Industry | Non ferrous Metal & Metal Products | Fabricated Metal Products        | 1     | 19     | 185   |

|                            |                                     |                                         |   |    |     |
|----------------------------|-------------------------------------|-----------------------------------------|---|----|-----|
| Manufacturing Industry     | Non ferrous Metal & Metal Products  | Metal Products, NEC                     | 1 | 19 | 186 |
| Manufacturing Industry     | Machinery                           | Machine Tools                           | 1 | 21 | 201 |
| Manufacturing Industry     | Machinery                           | Press Machines                          | 1 | 21 | 202 |
| Manufacturing Industry     | Machinery                           | Textile Machines                        | 1 | 21 | 203 |
| Manufacturing Industry     | Machinery                           | Construction Machines                   | 1 | 21 | 204 |
| Manufacturing Industry     | Machinery                           | Agricultural Machines                   | 1 | 21 | 205 |
| Manufacturing Industry     | Machinery                           | Special Industrial Machines             | 1 | 21 | 206 |
| Manufacturing Industry     | Machinery                           | Sawing & Knitting Machines              | 1 | 21 | 207 |
| Manufacturing Industry     | Machinery                           | Bearings                                | 1 | 21 | 208 |
| Manufacturing Industry     | Machinery                           | Office Machines                         | 1 | 21 | 209 |
| Manufacturing Industry     | Machinery                           | Machinery, NEC                          | 1 | 21 | 210 |
| Manufacturing Industry     | Electric & Electronic Equipment     | General Electric                        | 1 | 23 | 221 |
| Manufacturing Industry     | Electric & Electronic Equipment     | Heavy Electric                          | 1 | 23 | 222 |
| Manufacturing Industry     | Electric & Electronic Equipment     | Household Appliances                    | 1 | 23 | 223 |
| Manufacturing Industry     | Electric & Electronic Equipment     | Communication Equipment                 | 1 | 23 | 224 |
| Manufacturing Industry     | Electric & Electronic Equipment     | Electronic Components                   | 1 | 23 | 225 |
| Manufacturing Industry     | Electric & Electronic Equipment     | Electric Industrial Controls            | 1 | 23 | 226 |
| Manufacturing Industry     | Electric & Electronic Equipment     | Battery                                 | 1 | 23 | 227 |
| Manufacturing Industry     | Electric & Electronic Equipment     | Electric Auto Parts                     | 1 | 23 | 228 |
| Manufacturing Industry     | Electric & Electronic Equipment     | Electric Equipment, NEC                 | 1 | 23 | 229 |
| Manufacturing Industry     | Shipbuilding & Repairing            | Shipbuilding & Repairing                | 1 | 25 | 241 |
| Manufacturing Industry     | Motor Vehicles & Auto Parts         | Motor Vehicles                          | 1 | 27 | 261 |
| Manufacturing Industry     | Motor Vehicles & Auto Parts         | Auto Parts & Accessories                | 1 | 27 | 262 |
| Manufacturing Industry     | Motor Vehicles & Auto Parts         | Auto Body, NEC                          | 1 | 27 | 263 |
| Manufacturing Industry     | Transportation Equipment            | Railroad Equipment                      | 1 | 29 | 281 |
| Manufacturing Industry     | Transportation Equipment            | Bicycles                                | 1 | 29 | 282 |
| Manufacturing Industry     | Transportation Equipment            | Transportation Equipment, NEC           | 1 | 29 | 283 |
| Manufacturing Industry     | Precision Equipment                 | Watches & Clocks                        | 1 | 31 | 301 |
| Manufacturing Industry     | Precision Equipment                 | Optical Instrument                      | 1 | 31 | 302 |
| Manufacturing Industry     | Precision Equipment                 | Measuring Devices, NEC                  | 1 | 31 | 303 |
| Manufacturing Industry     | Other Manufacturing                 | Printing                                | 1 | 33 | 321 |
| Manufacturing Industry     | Other Manufacturing                 | Musical Instrument                      | 1 | 33 | 322 |
| Manufacturing Industry     | Other Manufacturing                 | Lumber & Wood Products                  | 1 | 33 | 323 |
| Manufacturing Industry     | Other Manufacturing                 | Office Supplies                         | 1 | 33 | 324 |
| Manufacturing Industry     | Other Manufacturing                 | Manufacturing, NEC                      | 1 | 33 | 325 |
| Non-Manufacturing Industry | Fish & Marine Products              | Fish & Marine Products                  | 2 | 35 | 341 |
| Non-Manufacturing Industry | Mining                              | Coal Mining                             | 2 | 37 | 361 |
| Non-Manufacturing Industry | Mining                              | Mining Except Coal Mining               | 2 | 37 | 362 |
| Non-Manufacturing Industry | Construction                        | General Construction (Major)            | 2 | 41 | 401 |
| Non-Manufacturing Industry | Construction                        | Other General Construction              | 2 | 41 | 402 |
| Non-Manufacturing Industry | Construction                        | Civil Engineering                       | 2 | 41 | 403 |
| Non-Manufacturing Industry | Construction                        | Electric Plant Construction             | 2 | 41 | 404 |
| Non-Manufacturing Industry | Construction                        | Home & Pre-Fabs                         | 2 | 41 | 406 |
| Non-Manufacturing Industry | Construction                        | Special Constructions                   | 2 | 41 | 406 |
| Non-Manufacturing Industry | Wholesale Trade                     | General Trading Companies               | 2 | 43 | 421 |
| Non-Manufacturing Industry | Wholesale Trade                     | Auto Wholesales & Dealers               | 2 | 43 | 422 |
| Non-Manufacturing Industry | Wholesale Trade                     | Wholesale - Foods                       | 2 | 43 | 423 |
| Non-Manufacturing Industry | Wholesale Trade                     | Wholesale - Fabrics & Apparel           | 2 | 43 | 424 |
| Non-Manufacturing Industry | Wholesale Trade                     | Wholesale - Machinery & Metals          | 2 | 43 | 425 |
| Non-Manufacturing Industry | Wholesale Trade                     | Wholesale - Chemicals                   | 2 | 43 | 426 |
| Non-Manufacturing Industry | Wholesale Trade                     | Wholesale - Lumber & Building Materials | 2 | 43 | 427 |
| Non-Manufacturing Industry | Wholesale Trade                     | Wholesale - Electric Goods              | 2 | 43 | 428 |
| Non-Manufacturing Industry | Wholesale Trade                     | Miscellaneous Wholesales                | 2 | 43 | 429 |
| Non-Manufacturing Industry | Retail Trade                        | Department Stores                       | 2 | 45 | 441 |
| Non-Manufacturing Industry | Retail Trade                        | Supermarket Chains                      | 2 | 45 | 442 |
| Non-Manufacturing Industry | Retail Trade                        | Installment Stores                      | 2 | 45 | 443 |
| Non-Manufacturing Industry | Retail Trade                        | Retail Stores, NEC                      | 2 | 45 | 444 |
| Non-Manufacturing Industry | Banks                               | Long-Term Credit Banks                  | 2 | 47 | 461 |
| Non-Manufacturing Industry | Banks                               | City Banks                              | 2 | 47 | 462 |
| Non-Manufacturing Industry | Banks                               | Regional Banks                          | 2 | 47 | 463 |
| Non-Manufacturing Industry | Banks                               | Trust Banks                             | 2 | 47 | 464 |
| Non-Manufacturing Industry | Banks                               | Mutual Loan & Saving Banks              | 2 | 47 | 465 |
| Non-Manufacturing Industry | Banks                               | Securities Finance                      | 2 | 47 | 466 |
| Non-Manufacturing Industry | Securities houses                   | Securities houses                       | 2 | 49 | 481 |
| Non-Manufacturing Industry | Insurance                           | Insurance                               | 2 | 51 | 501 |
| Non-Manufacturing Industry | Credit & Leasing                    | Credit & Leasing                        | 2 | 52 | 511 |
| Non-Manufacturing Industry | Real Estate                         | Real Estate - Rental                    | 2 | 53 | 521 |
| Non-Manufacturing Industry | Real Estate                         | Real Estate - Sales                     | 2 | 53 | 522 |
| Non-Manufacturing Industry | Railroad Transportation             | Railroad (Major)                        | 2 | 55 | 541 |
| Non-Manufacturing Industry | Railroad Transportation             | Railroad (Minor)                        | 2 | 55 | 542 |
| Non-Manufacturing Industry | Railroad Transportation             | Bus Transits                            | 2 | 55 | 543 |
| Non-Manufacturing Industry | Trucking                            | Trucking                                | 2 | 57 | 561 |
| Non-Manufacturing Industry | Sea Transportation                  | Shipping - Nucleus                      | 2 | 59 | 581 |
| Non-Manufacturing Industry | Sea Transportation                  | Shipping - Domestic                     | 2 | 59 | 582 |
| Non-Manufacturing Industry | Sea Transportation                  | Shipping - Foreign, NEC                 | 2 | 59 | 583 |
| Non-Manufacturing Industry | Air Transportation                  | Air Transportation                      | 2 | 61 | 601 |
| Non-Manufacturing Industry | Warehousing & Harbor Transportation | Warehousing                             | 2 | 63 | 621 |
| Non-Manufacturing Industry | Warehousing & Harbor Transportation | Harbor Transportation                   | 2 | 63 | 622 |
| Non-Manufacturing Industry | Communication Services              | Communication Services                  | 2 | 65 | 641 |
| Non-Manufacturing Industry | Utilities - Electric                | Utilities - Electric                    | 2 | 67 | 661 |
| Non-Manufacturing Industry | Utilities - Gas                     | Utilities - Gas                         | 2 | 69 | 681 |
| Non-Manufacturing Industry | Services                            | Motion Picture Production               | 2 | 71 | 701 |
| Non-Manufacturing Industry | Services                            | Amusement Services                      | 2 | 71 | 702 |
| Non-Manufacturing Industry | Services                            | Hotels                                  | 2 | 71 | 703 |
| Non-Manufacturing Industry | Services                            | Miscellaneous Services                  | 2 | 71 | 704 |

## 2 Structure of Directories and Files

The structure of directories and files used to make this paper is given in Figure 1.

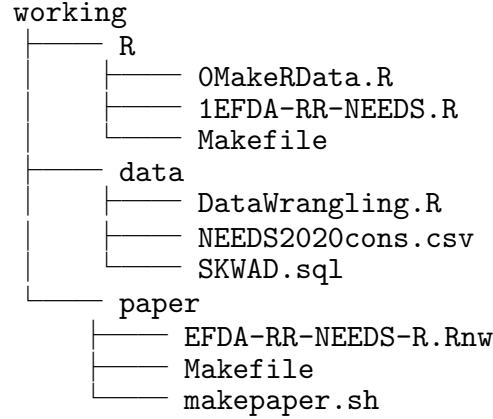

Figure 1: Structure of directories and files for study

## 3 Data Extraction and Wrangling

In this section, we describe the data extraction and wrangling used in this paper.

### 3.1 Data Extraction

The data in this paper are extracted from the data extraction system SKWAD (see Jimichi, 2022<sup>1</sup>) by using the SQL query file SKWAD.sql.

Script 1: SQL query file: SKWAD.sql

```
1 SELECT
2 f.firmname AS name,
3 b.a05 AS nikkei_firm_code,
4 b.a02 AS ym,
5 b.a35 AS sector,
6 b.a08 AS term,
7 b.a27 AS ac,
8 d.b001 AS sales,
9 h.b021 AS employees,
10 b.b001 AS assets_total
11 FROM (SELECT a02, a05, a08, a27, a29, a35, b001 FROM
12       yb01) AS b
13 JOIN (SELECT a02, a05, a08, a27, a29, a35, b001 FROM
14       yd01) AS d
15 ON d.a02 = b.a02 AND d.a05 = b.a05 AND d.a27 = b.a27
```

<sup>1</sup><http://hdl.handle.net/10236/00030225>

```

14 JOIN (SELECT a02, a05, a08, a27, a29, a35, b021 FROM
      yh01) AS h
15 ON h.a02 = b.a02 AND h.a05 = b.a05 AND h.a27 = b.a27
16 JOIN (SELECT nikkei_corp_code, firmname FROM firmlist)
      AS f
17 ON f.nikkei_corp_code = b.a05
18 WHERE d.a29 = '11'
19 ORDER BY b.a05, d.a02;

```

This file is stored in the `data` directory in Figure 1.

### 3.2 Data Wrangling

Data wrangling (cf. Wickham and Grolemund, 2016) is performed by executing the following R script file `DataWrangling.R` (Script 2).

Script 2: R script file for data wrangling: `DataWrangling.R`

```

1 # -----
2 # Data Wrangling
3 # -----
4 # Load Data
5 rawdata <- vroom::vroom("./NEEDS2020cons.csv")
6 # Data Manipulation
7 library(dplyr)
8 library(zoo)
9 x <- rawdata %>%
10   filter(substr(ym, 5, 6) == "03", term == 12) %>%
11   mutate(employees = na_if(employees, "-999999999999999"),
12          assets_total = na_if(assets_total, "-999999999999999"),
13          sales = na_if(sales, "-999999999999999")) %>%
14   mutate(
15     name = paste0(gsub("_", "", name), nikkei_firm_code),
16     sales = as.numeric(sales),
17     employees = as.numeric(employees),
18     assets = as.numeric(assets_total),
19     sector1 = as.factor(substr(sector, 1, 1)),
20     sector2 = as.factor(substr(sector, 2, 3)),
21     sector3 = as.factor(substr(sector, 4, 6)),
22     ymd = as.Date(as.yearmon(as.character(ym), "%Y%m")))
23     %>%
24     filter(ymd >= "1984-03-01") %>%
25     select(name, ymd, sector1, sector2, sector3, ac, sales
26            , employees, assets)

```

## 4 Reproducible Research with Dynamic Documents

In recent years, one of the methods to achieve *reproducible research* in the sense of ensuring the reproducibility of research, is the so-called *dynamic documents* in which a data analysis language code is embedded in a document and automatically executed by some method to dynamically generate the analysis results and then automatically read them to create a document. Dynamic documents have been proposed, in which a document is created by embedding data analysis

language code into a document and automatically executing it in some way (cf. Xie, 2015, Gandrud, 2022).

Although some tools for dynamic documents, such as Quarto (<https://quarto.org>), have been actively developed in recent years, in this study, we use Sweave developed by Leisch (2002) for document creation and GNU make (cf. Mecklenburg, 2005) for overall control including data analysis.

We introduce the environment and specifications for dynamic documents to create this paper. The source file of this paper is Sweave file `EFDA-RR-NEEDS-R.Rnw` located in the `paper` directory (see Figure 1), and to generate this paper dynamically, we use Makefile (Script 3) in the directory `paper` (see also Figure 1).

Script 3: Makefile File for Dynamic Documents

```

1 all:
2     date > start-all.txt
3     (cd ../R; make RData)
4     (/bin/bash makepaper.sh)
5     date > end-all.txt
6 paper:
7     /bin/bash makepaper.sh
8 clean:
9     rm paper-*.png
10    rm -r paper.tex *.log *.dvi *.aux *.out *.toc

```

The correspondence between the roles of the target `all` given in the Makefile file (Script 3) and the directory structure (Figure 1) is given in Figure 2.

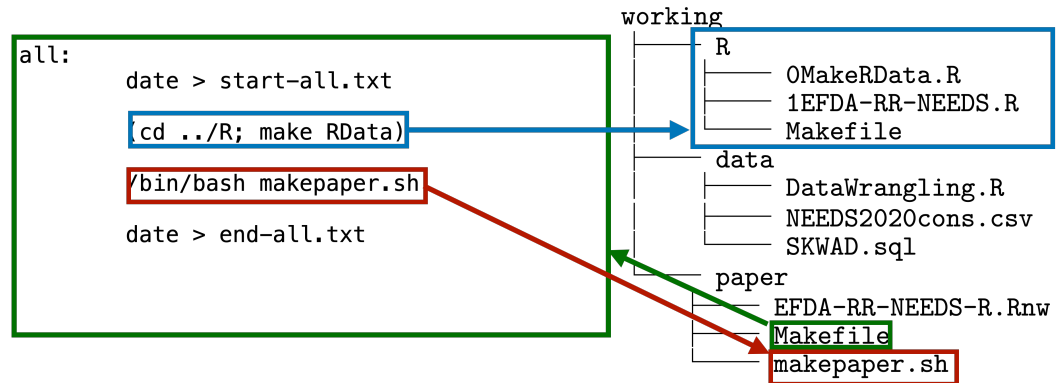

Figure 2: Correspondence between target `all` of Makefile file (Script 3) and directory structure (Figure 1)

The targets are defined in the first, sixth, and eighth lines of the Makefile file (Script 3). By executing the first target, `all`, with the command `make`, all the processes necessary for this paper, such as data analysis, Sweave processing, and compilation, are executed dynamically.

Dynamic documents are executed by executing the following command from the command line, using the **paper** directory in Figure 1 as current:

Execution of target **all** by the command **make**

```
% make all
```

Note that ‘%’ is a shell prompt.

The correspondence of all processes by execution of the **make** command of the target **Makefile** file (Script 3) of **all** is given in Figure 3.

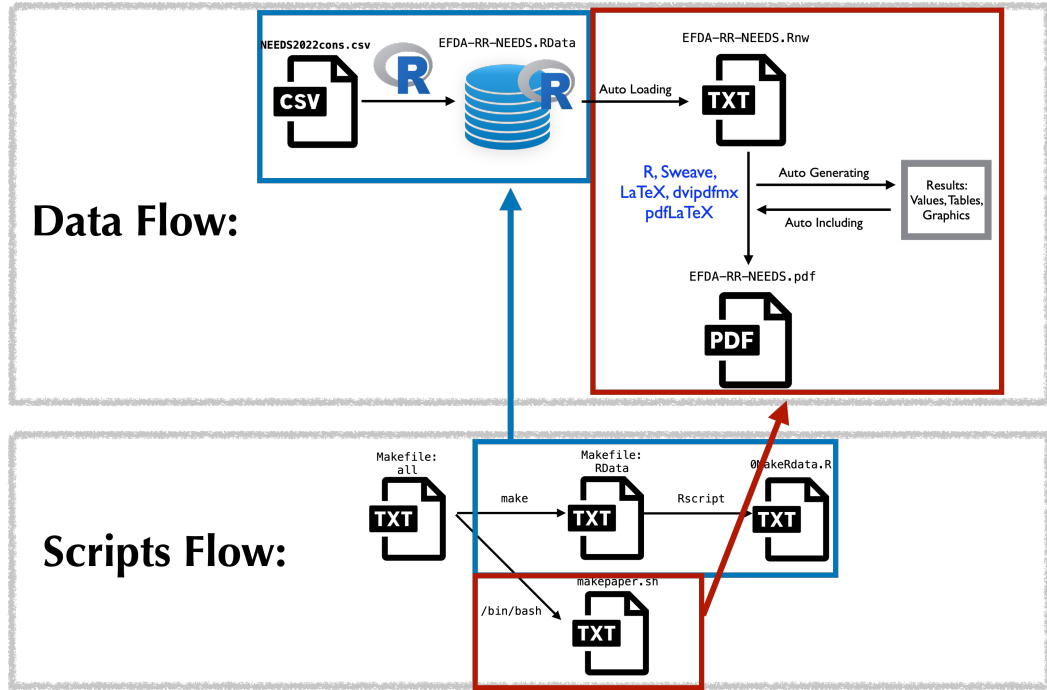

Figure 3: Flow of data files, document files, and script files and their correspondence with the execution of target **all**

Regarding the reproducibility research mentioned at the beginning of this section, the *reproducibility spectrum* by Peng (2011) is interesting as a criterion to express the degree of achievement (see Fig. 1 in Peng, 2011). According to the spectrum, the following grades are proposed to express the degree of achievement of reproducibility:

- (G1) publication only (not reproducible)
- (G2) code
- (G3) code and data

(G4) linked and executable code and data

(G5) full replication (gold standard)

In light of this spectrum, this study seems to belong to the “gold standard” zone because the reproducibility is ensured by automatically executing all the processes by **make**. Therefore, it can be said that the reproducibility of all the processes in Figure 4 is guaranteed at a high level.

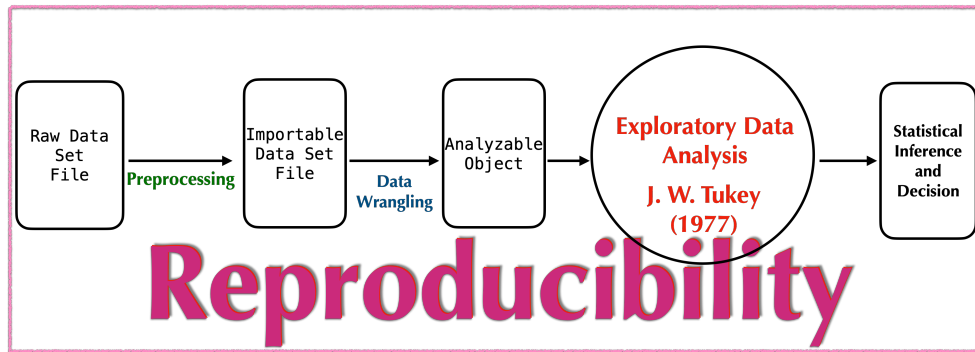

Figure 4: Total process of data analysis

## 5 Computing Environments

Our computing environments are as follows:

### Hardware

- MacBook Pro 2021:  
Processor: M1 Max  
Main Memory: 64 GB  
OS: macOS Ventura (12.7)
- Mac Studio 2022:  
Processor: M1 Ultra  
Main Memory: 128 GB  
OS: macOS Ventura (12.7)

### Software

- R (R. Ihaka, R. Gentleman, R Core Team, <https://www.r-project.org/>)

- R Packages
  - `{car}` (J. Fox, <https://socialsciences.mcmaster.ca/jfox/Books/Companion/index.html>)
  - `{dplyr}` (H. Wickham, <http://dplyr.tidyverse.org/>)
  - `{GGally::}ggpairs` (B. Schloerke, <http://ggobi.github.io/ggally/>)
  - `{ggplots2}` (H. Wickham, <https://ggplot2.tidyverse.org>)
  - `{magrittr}` (S. M. Bache, H. Wickham, and L. Henry, <https://magrittr.tidyverse.org>)
  - `{plotly}` (C. Sievert, <https://plotly.com/r/>)
  - `{purrr}` (L. Henry and H. Wickham, <https://purrr.tidyverse.org>)
  - `{rgl}` (D. Murdoch, <https://dmurdoch.github.io/rgl/>)
  - `{sn}` (A. Azzalini, <http://azzalini.stat.unipd.it/SN/>)
  - `{vroom}` (J. Hester, <https://vroom.r-lib.org>)
  - `{xtable}` (D. B. Dahl, <https://cran.r-project.org/web/packages/xtable/index.html>)
- RStudio (Posit, <https://posit.co>)
- Sweave (F. Leisch, <https://stat.ethz.ch/R-manual/R-devel/library/utils/doc/Sweave.pdf>)
- `sessionInfo`
  - R version 4.3.1 (2023-06-16), aarch64-apple-darwin20
  - Locale:  
ja\_JP.UTF-8/ja\_JP.UTF-8/ja\_JP.UTF-8/C/ja\_JP.UTF-8/ja\_JP.UTF-8
  - Time zone: Asia/Tokyo
  - TZcode source: internal
  - Running under: macOS Ventura 13.5.1
  - Matrix products: default
  - BLAS:  
/Library/Frameworks/R.framework/Versions/4.3-arm64/Resources/lib/libRblas.0.dylib
  - LAPACK:  
/Library/Frameworks/R.framework/Versions/4.3-arm64/Resources/lib/libRlapack.dylib  
; LAPACK version3.11.0
  - Base packages: base, datasets, graphics, grDevices, methods, stats, stats4, utils
  - Other packages: car 3.1-2, carData 3.0-5, dplyr 1.1.2, forcats 1.0.0, ggplot2 3.4.2, lubridate 1.9.2, purrr 1.0.1, readr 2.1.4, sn 2.1.1, stringr 1.5.0, tibble 3.2.1, tidyr 1.3.0, tidyverse 2.0.0, xtable 1.8-4

– Loaded via a namespace (and not attached): abind 1.4-5, cli 3.6.1, colorspace 2.1-0, compiler 4.3.1, fansi 1.0.4, generics 0.1.3, glue 1.6.2, grid 4.3.1, gtable 0.3.3, hms 1.1.3, lifecycle 1.0.3, magrittr 2.0.3, mnormt 2.1.1, munsell 0.5.0, numDeriv 2016.8-1.1, pillar 1.9.0, pkgconfig 2.0.3, R6 2.5.1, rlang 1.1.1, scales 1.2.1, stringi 1.7.12, tidyselect 1.2.0, timechange 0.2.0, tools 4.3.1, tzdb 0.4.0, utf8 1.2.3, vctrs 0.6.3, withr 2.5.0
